# Supplementary material
Source: publisher figshare collection journal article supplement (https://acs.figshare.com/ndownloader/files/4464820)
Supplement: Supplementary file 1 [file 4464820]

# Formation of Ultrathin Birnessite-Type Nanoparticles Immobilized on Spherical Polyelectrolyte Brushes

## Supplementary Material

*Frank Polzer,<sup>§</sup> Daniel A. Kunz,<sup>‡</sup> Josef Breu,<sup>‡</sup> Matthias Ballauff<sup>§\*</sup>*

<sup>§</sup>Helmholtz-Zentrum Berlin für Materialien und Energie GmbH, Hahn-Meitner-Platz 1, 14109 Berlin, Germany, and Department of Physics, Humboldt University Berlin, Newtonstr. 15, 12489 Berlin, Germany.

<sup>‡</sup> Department of Inorganic Chemistry I, University of Bayreuth, 95440 Bayreuth, Germany

(Matthias.Ballauff@helmholtz-berlin.de)

**RECEIVED DATE (Jan 22, 2010)**

## Supporting Information

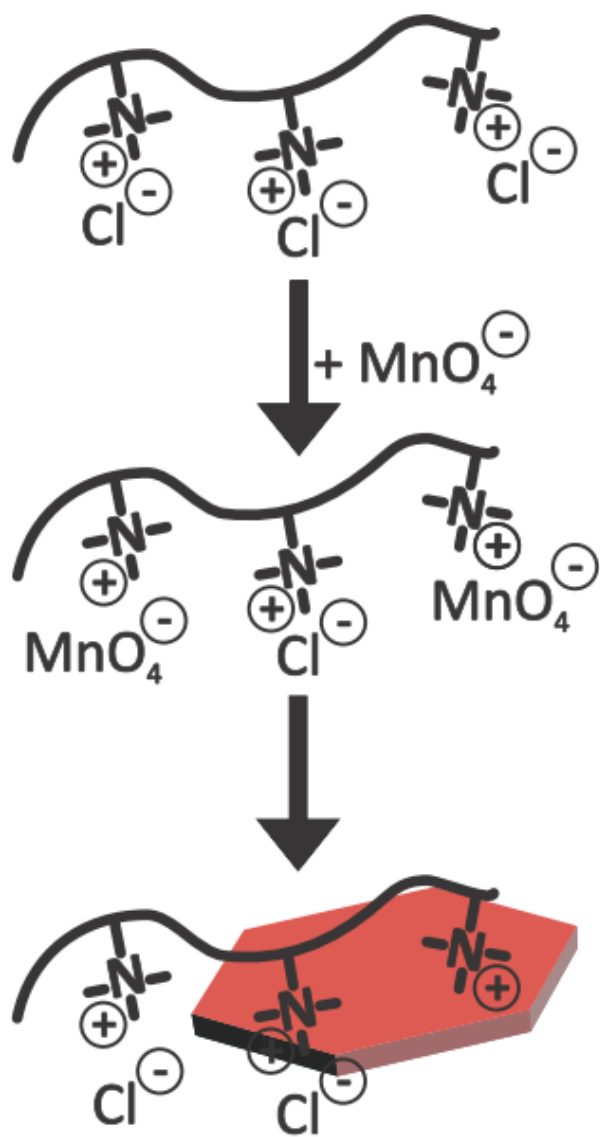

**Figure S1.** Proposed mechanism for the  $\text{MnO}_2\text{NP}$  generation at SPB. By adding  $\text{KMnO}_4$  solution to the SPB dispersion, a pTMAEMC/ $\text{MnO}_4$  precursor is formed which gets instantly reduced inside the brush layer. As a consequence, birnessite-type  $\text{MnO}_2\text{NP}$  (red hexagon) are generated which are stabilized by the polyelectrolyte chains of the SPBs.

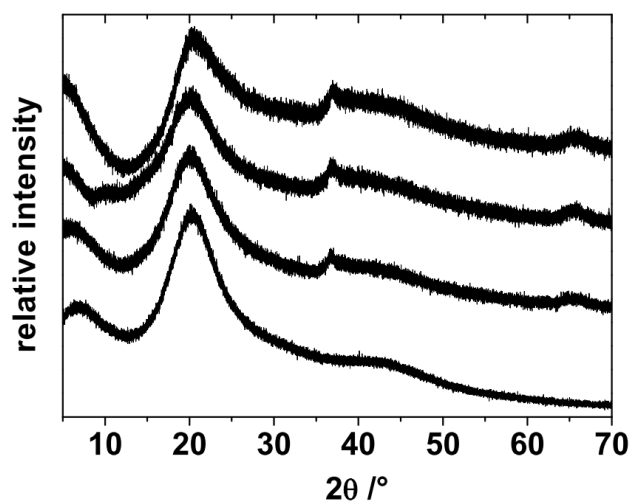

**Figure S2.** PXRD patterns of the bare SPB pTMAEMC-40 and the composite systems SPB-MnO<sub>2</sub>-5, SPB-MnO<sub>2</sub>-8 and SPB-MnO<sub>2</sub>-9 from undermost to uppermost curve. The  $hk$ -bands of the composite systems refer to the birnessite nano-needles that exhibit only a 2D order within the  $ab$ -layer plane.

(a)

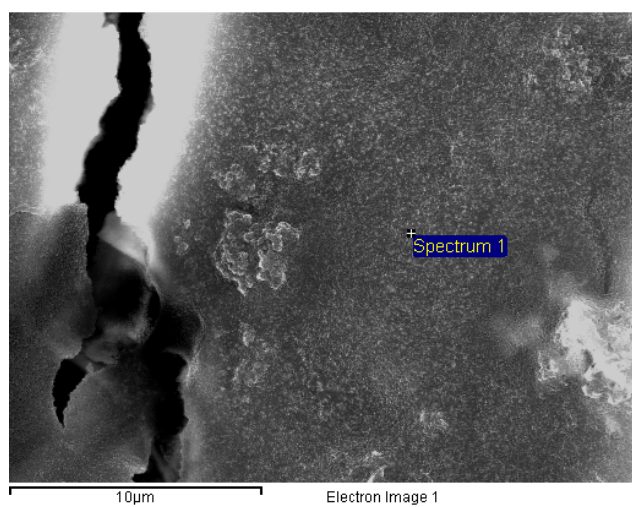

(b)

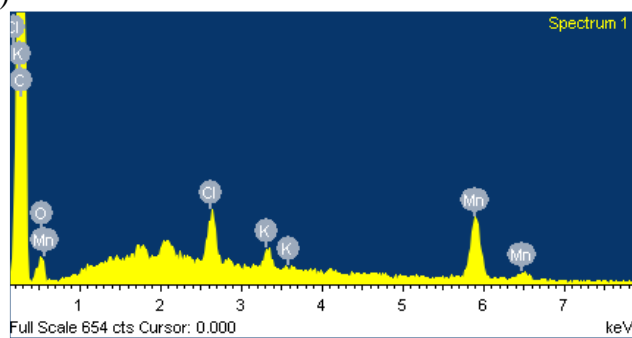

**Figure S3.** (a) SEM image of the sample SPB-MnO<sub>2</sub>-8 and (b) the corresponding EDX pattern that indicates the formation of the MnO<sub>2</sub>NP with K<sup>+</sup> ions inside the interlayers of birnessite.
